# Supplementary material
Source: publisher site journal article supplement (https://www.dovepress.com/article/453414)
Supplement: Supplementary file 1 [file get_supplementary_file.php]

**Supplement**

Supplementary table 1. Correlation between the concentration of nasal secretion ECP, colour grading of the ECP test paper and Dermatophagoides components of sIgG4.

| Nasal secretion ECP and serum IgE and dermatophagoides components of sIgG4 | | | | | | | | | | |
| --- | --- | --- | --- | --- | --- | --- | --- | --- | --- | --- |
| Month | Der p 1 | | Der f 1 | | Der p 2 | | Der f 2 | | Der p 5 | |
| R value | P value | R value | P value | R value | P value | R value | P value | R value | P value |
| 0 | -0.210 | 0.130 | -0.104 | 0.457 | **-0.321** | 0.019 | **-0.300** | 0.029 | -0.165 | 0.238 |
| 6 | **-0.280** | 0.042 | -0.168 | 0.230 | -0.262 | 0.058 | -0.214 | 0.125 | **-0.322** | 0.019 |
| 12 | -0.216 | 0.121 | -0.009 | 0.947 | -0.166 | 0.234 | -0.096 | 0.492 | -0.230 | 0.098 |
| Nasal secretion ECP and dermatophagoides components of sIgG4 | | | | | | | | | | |
| Month | Der p 7 | | Der p 10 | | Der p 21 | | Der p 23 | |  | |
| R value | P value | R value | P value | R value | P value | R value | P value |  |  |
| 0 | -0.149 | 0.288 | **-0.332** | 0.015 | -0.237 | 0.088 | -0.221 | 0.111 |  |  |
| 6 | -0.189 | 0.174 | -0.244 | 0.078 | -0.245 | 0.077 | -0.208 | 0.135 |  |  |
| 12 | -0.209 | 0.133 | -0.194 | 0.163 | -0.152 | 0.276 | **-0.294** | 0.032 |  |  |
| ECP test paper color garding and dermatophagoides components of sIgG4 | | | | | | | | | | |
| Month | Der p 1 | | Der f 1 | | Der p 2 | | Der f 2 | | Der p 5 | |
| R value | P value | R value | P value | R value | P value | R value | P value | R value | P value |
| 0 | -0.228 | 0.101 | -0.236 | 0.089 | **-0.385** | 0.004 | **-0.333** | 0.015 | -0.155 | 0.267 |
| 6 | **-0.302** | 0.028 | -0.161 | 0.248 | **-0.359** | 0.008 | **-0.292** | 0.034 | -0.254 | 0.067 |
| 12 | **-0.297** | 0.031 | -0.043 | 0.759 | -0.211 | 0.129 | -0.195 | 0.161 | **-0.314** | 0.022 |
| ECP test paper color garding and dermatophagoides components of sIgG4 | | | | | | | | | | |
| Month | Der p 7 | | Der p 10 | | Der p 21 | | Der p 23 | |  | |
| R value | P value | R value | P value | R value | P value | R value | P value |  |  |
| 0 | -0.127 | 0.363 | **-0.351** | 0.010 | -0.151 | 0.279 | -0.257 | 0.063 |  |  |
| 6 | -0.170 | 0.223 | -0.217 | 0.119 | -0.243 | 0.080 | -0.157 | 0.263 |  |  |
| 12 | -0.133 | 0.343 | -0.232 | 0.095 | -0.224 | 0.107 | -0.262 | 0.058 |  |  |

The bold part: the correlation coefficient is statistically significant.

Supplementary table 2.Correlation between the color grading of the ECP test paper and Inflammatory factors, chemokines.

| ECP test paper color garding and inflammatory factors | | | | | | | | |
| --- | --- | --- | --- | --- | --- | --- | --- | --- |
| Month | IL-4 | | IL-6 | | IL-10 | | IL-17A | |
| R value | P value | R value | P value | R value | P value | R value | P value |
| 0 | **0.624** | ＜0.001 | **0.324** | 0.017 | **0.341** | 0.013 | 0.219 | 0.116 |
| 6 | **0.585** | ＜0.001 | **0.441** | 0.010 | **0.352** | 0.010 | 0.162 | 0.247 |
| 12 | **0.600** | ＜0.001 | **0.334** | 0.014 | **0.375** | 0.006 | 0.130 | 0.353 |
| ECP test paper color garding and inflammatory factors | | | | | | | | |
| Month | IFN-g | | TNF-a | | IL-2 | |  | |
| R value | P value | R value | P value | R value | P value | R value | P value |
| 0 | **-0.577** | ＜0.001 | -0.211 | 0.129 | **-0.389** | 0.004 |  |  |
| 6 | **-0.439** | 0.001 | **-0.283** | 0.040 | **-0.375** | 0.006 |  |  |
| 12 | **-0.572** | ＜0.001 | **-0.323** | 0.018 | -0.261 | 0.059 |  |  |
| ECP test paper color garding and chemokines | | | | | | | | |
| Month | CCL22 | | CCL26 | | CCL17 | | CCL11 | |
| R value | P value | R value | P value | R value | P value | R value | P value |
| 0 | **0.561** | ＜0.001 | **0.721** | ＜0.001 | **0.484** | ＜0.001 | **0.422** | 0.002 |
| 6 | **0.655** | ＜0.001 | **0.751** | ＜0.001 | **0.397** | 0.003 | **0.421** | 0.002 |
| 12 | **0.697** | ＜0.001 | **0.795** | ＜0.001 | **0.356** | 0.009 | **0.393** | 0.004 |

The bold part: the correlation coefficient is statistically significant.
